# Supplementary material
Source: HighWire-hosted journal article supplement (http://www.ghspjournal.org/highwire/filestream/1576/field_highwire_adjunct_files/2/14-00156-Cooper-Supplementary_material-job_aid.pdf)
Supplement: 14-00156-Cooper-Supplementary_material-job_aid.pdf [file 14-00156-Cooper-Supplementary_material-job_aid.pdf]

# JOB AID FOR VACCINATORS

## 1) At end of EPI visit, **remind the mother:**

Don't forget to come back for your child's next vaccine on \_\_\_\_\_ date.

## 2) Then, **tell the baby's mother these messages:**

- Sister/Ma, since you are already here at the clinic, maybe you also want to go for family planning.
- Family planning can help you put space between your children and it is good to use even before the baby starts walking.
- It will give you time to rest and be strong to care for your baby.
- Baby ma who come here for vaccine are going for family planning and they don't pay money for it.

## 3) **Show mother the family planning poster.**

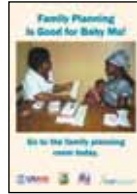

## 4) Then, **ask mother the following question:**

Would you like to see the family planning provider today?

### → **IF YES**

Good, let me show you the way.

### → **IF NO**

You don't have to start family planning today, but maybe you would like to hear more information. Are you interested?

### → **IF YES**

Good, let me show you the place.

### → **IF NO**

Okay, please carry this paper, read it or let somebody read it to you, and think about coming back soon for family planning.

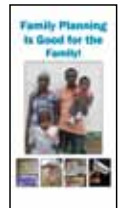

## 5) **Tell the mother:**

"Thank you for coming today. We look forward to seeing you again soon."
